# Supplementary material for: Berkeley Screen: a set of 96 solutions for general macromolecular crystallization
Source: PubMed Central journal article supplement (PMC5627680; doi:10.1107/s1600576717011347), 2017-09-05
Supplement: j-50-01352-sup1.pdf [file j-50-01352-sup1.pdf]

## Berkeley Screen Formulation

| Solution | Salt                                                            | Solution | Buffer                                             | Solution | Precipitant                                  |
|----------|-----------------------------------------------------------------|----------|----------------------------------------------------|----------|----------------------------------------------|
| A1.      | 0.05 M Calcium Chloride                                         | A1.      | 0.1 M TRIS-HCl pH 8.0                              | A1.      | 2.2 M Sodium Chloride                        |
| A2.      | None                                                            | A2.      | 0.1 M Sodium Acetate trihydrate pH 4.5             | A2.      | 2.0 M Sodium Formate                         |
| A3.      | None                                                            | A3.      | 0.1 M Sodium Citrate pH 5.3                        | A3.      | 2.0 M Ammonium Sulfate                       |
| A4.      | None                                                            | A4.      | 0.1 M BIS-TRIS pH 6.5                              | A4.      | 1.8 M Ammonium Sulfate<br>10% 2-propanol     |
| A5.      | None                                                            | A5.      | None                                               | A5.      | 2.2 M Sodium malonate pH 5.0                 |
| A6.      | None                                                            | A6.      | None                                               | A6.      | 2.2 M Sodium malonate pH 7.0                 |
| A7.      | None                                                            | A7.      | None                                               | A7.      | 2.2 M Sodium malonate pH 8.0                 |
| A8.      | 0.2 M Potassium Chloride                                        | A8.      | 0.1 M Hepes pH 7.5                                 | A8.      | 30 % Pentaerythritol propoxylate (5/4 PO/OH) |
| A9.      | 0.1 M Magnesium Chloride                                        | A9.      | 0.1 M Sodium acetate trihydrate pH 4.5             | A9.      | 30 % Pentaerythritol propoxylate (5/4 PO/OH) |
| A10.     | 0.2 M Ammonium Acetate                                          | A10.     | 0.1 M BIS-TRIS pH 6.5                              | A10.     | 25 % Pentaerythritol propoxylate (5/4 PO/OH) |
| A11.     | 0.4 M Sodium Chloride                                           | A11.     | 0.1 M MES pH 5.5                                   | A11.     | 25 % Pentaerythritol propoxylate (5/4 PO/OH) |
| A12.     | None                                                            | A12.     | 0.1 M Hepes pH 7.5                                 | A12.     | 35 % PEG 3,350<br>10 % 2-propanol            |
| B1.      | 0.4 M Sodium Chloride                                           | B1.      | 0.1M Tris-HCl pH 8.5                               | B1.      | 30% PEG 3,350                                |
| B2.      | 0.4 M Sodium Chloride                                           | B2.      | 0.1M Hepes pH 7.5                                  | B2.      | 30% PEG 3,350                                |
| B3.      | 0.4 M Sodium Chloride                                           | B3.      | 0.1M BIS-TRIS pH 6.5                               | B3.      | 30% PEG 3,350                                |
| B4.      | 0.1 M Potassium - Sodium Tartrate<br>0.005 M Magnesium Chloride | B4.      | None                                               | B4.      | 25 % PEG 3,350                               |
| B5.      | 0.2 M Lithium Sulfate                                           | B5.      | None                                               | B5.      | 20% PEG 3350                                 |
| B6.      | 0.2 M Sodium Fluoride                                           | B6.      | None                                               | B6.      | 20% PEG 3350                                 |
| B7.      | None                                                            | B7.      | 0.04 M Citric Acid, 0.06 M BIS-TRIS propane pH 6.4 | B7.      | 25 % PEG 3,350                               |
| B8.      | None                                                            | B8.      | 0.03 M Citric Acid, 0.07 M BIS-TRIS propane pH 7.6 | B8.      | 25 % PEG 3,350                               |
| B9.      | 0.2 M Magnesium Chloride                                        | B9.      | 0.1 M BIS-TRIS pH 6.5                              | B9.      | 25 % PEG 3,350                               |
| B10.     | 0.025 M Magnesium Chloride                                      | B10.     | 0.1M TRIS pH 8.0                                   | B10.     | 25% PEG 3350                                 |
| B11.     | 0.2 M Ammonium Sulfate                                          | B11.     | 0.1M Tris-HCl pH 8.5                               | B11.     | 25% PEG 3350                                 |
| B12.     | 0.2 M Ammonium Sulfate                                          | B12.     | 0.1M Hepes pH 7.5                                  | B12.     | 25% PEG 3350                                 |
| C1.      | 0.2 M Ammonium Sulfate                                          | C1.      | 0.1M BIS-TRIS pH 6.5                               | C1.      | 25% PEG 3350                                 |
| C2.      | 0.2 M Ammonium Sulfate                                          | C2.      | 0.1 M MES pH 5.5                                   | C2.      | 25% PEG 3350                                 |
| C3.      | 0.1 M Calcium Chloride                                          | C3.      | None                                               | C3.      | 20% PEG 3350                                 |
| C4.      | 0.1 M Magnesium Chloride                                        | C4.      | 0.1 M MES pH 5.5                                   | C4.      | 20% PEG 3350                                 |
| C5.      | 0.3 M Sodium Citrate                                            | C5.      | 0.1 M Hepes pH 7.5                                 | C5.      | 15 % PEG 3,350                               |
| C6.      | 0.2 M Potassium Chloride                                        | C6.      | None                                               | C6.      | 25 % PEG 3,350                               |
| C7.      | 0.1 M di-Ammonium Phosphate                                     | C7.      | None                                               | C7.      | 25 % PEG 3,350                               |
| C8.      | 0.1 M Sodium Chloride<br>0.1M Magnesium Chloride                | C8.      | None                                               | C8.      | 20 % PEG 3,350                               |

|      |                                                   |      |                                                    |      |                                       |
|------|---------------------------------------------------|------|----------------------------------------------------|------|---------------------------------------|
| C9.  | 0.1 M Sodium Acetate                              | C9.  | 0.1 M BIS-TRIS pH 6.5                              | C9.  | 25 % PEG 3,350                        |
| C10. | 0.1 M di-Ammonium Phosphate                       | C10. | 0.1 M Sodium Acetate pH 4.5                        | C10. | 20 % PEG 3,350<br>5% 2-propanol       |
| C11. | 0.1 M Sodium malonate pH 7.0                      | C11. | 0.04 M Citric Acid, 0.06 M BIS-TRIS propane pH 6.4 | C11. | 20 % PEG 3,350                        |
| C12. | 0.1 M Sodium malonate pH 7.0                      | C12. | 0.03 M Citric Acid, 0.07 M BIS-TRIS propane pH 7.6 | C12. | 20 % PEG 3,350                        |
| D1.  | 0.1 M Sodium malonate pH 7.0                      | D1.  | 0.1 M TRIS-HCl pH 8.5                              | D1.  | 20 % PEG 3,350                        |
| D2.  | 0.2 M Potassium - Sodium Tartrate                 | D2.  | 0.1 M Hepes pH 7.5                                 | D2.  | 20 % PEG 3,350                        |
| D3.  | 0.2 M Potassium - Sodium Tartrate                 | D3.  | 0.1 M BIS-TRIS pH 6.5                              | D3.  | 20 % PEG 3,350                        |
| D4.  | 0.2 M Sodium Acetate pH 4.5                       | D4.  | None                                               | D4.  | 25 % PEG 3,350                        |
| D5.  | 0.2 M Ammonium Acetate                            | D5.  | 0.1 M Hepes pH 7.5                                 | D5.  | 25 % PEG 3,350                        |
| D6.  | 0.2 M Ammonium Acetate                            | D6.  | 0.1 M MES pH 5.5                                   | D6.  | 25 % PEG 3,350                        |
| D7.  | 0.1 M Potassium Chloride                          | D7.  | None                                               | D7.  | 30 % PEG 3,350                        |
| D8.  | 0.1 M di-Ammonium Citrate                         | D8.  | 0.1 M MES pH 5.5                                   | D8.  | 20 % PEG 3,350<br>5% 2-propanol       |
| D9.  | 0.1 M di-Ammonium Phosphate                       | D8.  | 0.1 M BIS-TRIS pH 6.5                              | D8.  | 20 % PEG 3,350<br>5% 2-propanol       |
| D10. | 0.1 M Lithium Sulfate<br>0.1 M Magnesium Chloride | D10. | 0.1 M Hepes pH 7.5                                 | D10. | 20% PEG 3350<br>10 % hexanediol       |
| D11. | 0.1 M Lithium Sulfate<br>0.1 M Sodium Chloride    | D11. | 0.1 M BIS-TRIS pH 6.5                              | D11. | 20% PEG 3350<br>10 % hexanediol       |
| D12. | None                                              | D12. | 0.1 M Sodium Acetate pH 4.5                        | D12. | 20 % PEG MME 2,000                    |
| E1.  | 0.2 M Sodium Chloride                             | E1.  | None                                               | E1.  | 25 % PEG MME 2,000                    |
| E2.  | 0.2 M Ammonium Sulfate                            | E2.  | None                                               | E2.  | 25 % PEG MME 2,000                    |
| E3.  | 0.6 M Magnesium Chloride                          | E3.  | 0.1 M MES pH 5.5                                   | E3.  | 15 % PEG MME 2,000                    |
| E4.  | 1.5 M Ammonium sulfate                            | E4.  | 0.1 M Hepes pH 7.5                                 | E4.  | None                                  |
| E5.  | 1.2 M Ammonium sulfate                            | E5.  | 0.1 M BIS-TRIS pH 6.5                              | E5.  | None                                  |
| E6.  | 0.2 M Sodium malonate pH 5.0                      | E6.  | 0.1 M Sodium Citrate pH 5.5                        | E6.  | 20 % PEG MME 2,000                    |
| E7.  | 0.2 M Sodium malonate pH 7.0                      | E7.  | 0.1 M BIS-TRIS pH 6.5                              | E7.  | 20 % PEG MME 2,000                    |
| E8.  | 0.2 M Sodium malonate pH 7.0                      | E8.  | 0.1 M Hepes pH 7.5                                 | E8.  | 20 % PEG MME 2,000                    |
| E9.  | 0.2 M Sodium malonate pH 8.0                      | E9.  | 0.1 M TRIS-HCl pH 8.5                              | E9.  | 20 % PEG MME 2,000                    |
| E10. | 0.2 M Sodium Chloride                             | E10. | None                                               | E10. | 20 % PEG MME 2,000<br>10 % Hexanediol |
| E11. | 0.2 M di-Ammonium Phosphate                       | E11. | None                                               | E11. | 25 % PEG MME 550                      |
| E12. | 0.2 M di-Sodium Tartrate                          | E12. | 0.1 M Hepes pH 7,5                                 | E12. | 25 % PEG MME 550                      |
| F1.  | 0.8 M Ammonium sulfate                            | F1.  | None                                               | F1.  | 10 % PEG MME 550                      |
| F2.  | 0.2 M Magnesium Chloride                          | F2.  | None                                               | F2.  | 25 % PEG MME 550                      |
| F3.  | 0.2 M Ammonium acetate                            | F3.  | None                                               | F3.  | 20 % PEG MME 5,000                    |
| F4.  | 2.0 M Sodium Formate                              | F4.  | 0.1 M MES pH 5.5                                   | F4.  | 5 % PEG MME 5,000                     |
| F5.  | 2.0 M Sodium Formate                              | F5.  | 0.1 M BIS-TRIS pH 6.5                              | F5.  | 5 % PEG MME 5,000                     |
| F6.  | 2.0 M Sodium Formate                              | F6.  | 0.1 M Hepes pH 7.5                                 | F6.  | 5 % PEG MME 5,000                     |

|      |                            |      |                                                      |      |                                  |
|------|----------------------------|------|------------------------------------------------------|------|----------------------------------|
| F7.  | 0.2 M Lithium sulfate      | F7.  | 0.1 M TRIS-HCl pH 8.5                                | F7.  | 20 % PEG MME 5,000               |
| F8.  | None                       | F8.  | 0.1 M Hepes pH 7.5                                   | F8.  | 55 % 2-methyl-2,4-pentane diol   |
| F9.  | None                       | F9.  | 0.1 M MES buffer pH 6.5                              | F9.  | 30% of 2-methyl-2,4-pentane diol |
| F10. | 0.01 M Magnesium Chloride  | F10. | 0.05 M Hepes pH 7.2<br>0.05 M Sodium Citrate pH 5.8  | F10. | 12% 2-methyl-2,4-pentane diol    |
| F11. | 0.1 M Sodium Acetate       | F11. | 0.1 M MES pH 5.5                                     | F11. | 40 % 2-methyl-2,4-pentane diol   |
| F12. | 0.1 M Sodium Formate       | F12. | 0.1 M Sodium Citrate pH 5.5                          | F12. | 35 % 2-methyl-2,4-pentane diol   |
| G1.  | 0.4 M Lithium Sulfate      | G1.  | 0.1 M TRIS-HCl pH 8.0                                | G1.  | 25 % 2-methyl-2,4-pentane diol   |
| G2.  | 0.2 M Sodium Malonate      | G2.  | 0.1 M BIS-TRIS pH 6.5                                | G2.  | 45 % 2-methyl-2,4-pentane diol   |
| G3.  | 0.1 M Sodium citrate       | G3.  | 0.1 M Hepes pH 7.5                                   | G3.  | 30 % 2-methyl-2,4-pentane diol   |
| G4.  | 0.4 M Magnesium chloride   | G4.  | 0.1 M Sodium Acetate pH 4.5                          | G4.  | 20 % 2-methyl-2,4-pentane diol   |
| G5.  | 0.1 M Potassium Chloride   | G5.  | 0.04 M Citric Acid, 0.06 M BIS-TRIS propane pH 6.4   | G5.  | 15 % 2-methyl-2,4-pentane diol   |
| G6.  | 0.5 M di-Ammonium Tartrate | G6.  | None                                                 | G6.  | 10 % 2-methyl-2,4-pentane diol   |
| G7.  | 1.5 M Ammonium Sulfate     | G7.  | 0.1 M Sodium acetate pH 4.5                          | G7.  | 5 % 2-methyl-2,4-pentane diol    |
| G8.  | 0.8 M Ammonium Phosphate   | G8.  | 0.1 M BIS-TRIS pH 6.5                                | G8.  | 15 % 2-methyl-2,4-pentane diol   |
| G9.  | None                       | G9.  | 0.1 M BIS-TRIS pH 6.5                                | G9.  | 45 % PEG 400                     |
| G10. | 0.2 M Magnesium Chloride   | G10. | 0.1 M Hepes pH 7.5                                   | G10. | 30% PEG 400                      |
| G11. | 0.6 M Magnesium Chloride   | G11. | 0.1 M Hepes pH 7.5                                   | G11. | 25% PEG 400                      |
| G12. | 0.02 M Cadmium Chloride    | G12. | 0.025 M Citric Acid, 0.075 M BIS-TRIS propane pH 8.2 | G12. | 25 % PEG 400                     |
| H1.  | 0.2 M di-Sodium Tartrate   | H1.  | 0.1 M Sodium Acetate pH 4.5                          | H1.  | 25 % PEG 400                     |
| H2.  | 0.2 M Sodium Fluoride      | H2.  | 0.1 M MES pH 5.5                                     | H2.  | 20 % PEG 400                     |
| H3.  | 0.1 M Sodium Chloride      | H3.  | None                                                 | H3.  | 25 % PEG 400                     |
| H4.  | 0.2 M Magnesium Chloride   | H4.  | 0.04 M Citric Acid, 0.06 M BIS-TRIS propane pH 6.4   | H4.  | 25 % PEG 400                     |
| H5.  | 0.1 M Sodium Acetate       | H5.  | None                                                 | H5.  | 25 % PEG 400                     |
| H6.  | 0.1 M Lithium sulfate      | H6.  | 0.1 M MES pH 5.5                                     | H6.  | 20 % PEG 1,500                   |
| H7.  | 0.1 M Calcium Chloride     | H7.  | 0.1 M Hepes pH 7.5                                   | H7.  | 12 % Hexane diol                 |
| H8.  | 0.1 M Cadmium Chloride     | H8.  | 0.1 M Hepes pH 7.5                                   | H8.  | 20 % PEG 1,500                   |
| H9.  | 0.2 M Ammonium Acetate     | H9.  | 0.1 M Sodium Acetate pH 4.6                          | H9.  | 5 % 2-propanol                   |
| H10. | None                       | H10. | 0.1 M Hepes pH 7.5                                   | H10. | 30 % PEG 4,000                   |
| H11. | 0.2 M Sodium Acetate       | H11. | 0.1 M BIS-TRIS pH 6.5                                | H11. | 25 % PEG 4,000                   |
| H12. | 0.1 M Magnesium Chloride   | H12. | None                                                 | H12. | 20 % PEG 8,000, 10 % Hexane diol |
| H13. | 0.1 M Calcium Chloride     | H13. | 0.1 M Calcium Chloride                               | H13. |                                  |
| H14. | 0.2 M Ammonium Acetate     | H14. | 0.1 M TRIS-HCl pH 8.0                                | H14. | 15 % PEG 10,000                  |
